# Supplementary material for: Spatial Transcriptomic Analysis of a Diverse Patient Cohort Reveals a Conserved Architecture in Triple-Negative Breast Cancer
Source: Oxford University Press journal article supplement (doi:10.1158/0008-5472.can-22-2682), 2022-10-25
Supplement: can-22-2682_supplementary_file_2_suppsfile2.xlsx [file can-22-2682_supplementary_file_2_suppsfile2.xlsx]

## Sheet: Sheet1
Breast cancer microarray datasets queried in survial analysis
Record	URL	Reference
E-MTAB-365	https://www.ebi.ac.uk/arrayexpress/experiments/E-MTAB-365/	Guedj M, Marisa L, de Reynies A, et al. A refined molecular taxonomy of breast cancer. Oncogene. 2012 Mar;31(9):1196-1206. DOI: 10.1038/onc.2011.301. PMID: 21785460; PMCID: PMC3307061.
GSE11121	https://www.ncbi.nlm.nih.gov/geo/query/acc.cgi?acc=gse11121	Schmidt M, Böhm D, von Törne C, Steiner E et al. The humoral immune system has a key prognostic impact in node-negative breast cancer. Cancer Res 2008 Jul 1;68(13):5405-13. PMID: 18593943
GSE12093	https://www.ncbi.nlm.nih.gov/geo/query/acc.cgi?acc=GSE12093	Zhang Y, Sieuwerts AM, McGreevy M, Casey G et al. The 76-gene signature defines high-risk patients that benefit from adjuvant tamoxifen therapy. Breast Cancer Res Treat 2009 Jul;116(2):303-9. PMID: 18821012
GSE12276	https://www.ncbi.nlm.nih.gov/geo/query/acc.cgi?acc=GSE12276	Bos PD, Zhang XH, Nadal C, Shu W et al. Genes that mediate breast cancer metastasis to the brain. Nature 2009 Jun 18;459(7249):1005-9. PMID: 19421193
GSE1456	https://www.ncbi.nlm.nih.gov/geo/query/acc.cgi?acc=GSE1456	Pawitan Y, Bjöhle J, Amler L, Borg AL et al. Gene expression profiling spares early breast cancer patients from adjuvant therapy: derived and validated in two population-based cohorts. Breast Cancer Res 2005;7(6):R953-64. PMID: 16280042
GSE16446	https://www.ncbi.nlm.nih.gov/geo/query/acc.cgi?acc=GSE16446	Desmedt C, Di Leo A, de Azambuja E, Larsimont D et al. Multifactorial approach to predicting resistance to anthracyclines. J Clin Oncol 2011 Apr 20;29(12):1578-86. PMID: 21422418
GSE16716	https://www.ncbi.nlm.nih.gov/geo/query/acc.cgi?acc=GSE16716	Popovici V, Chen W, Gallas BG, Hatzis C et al. Effect of training-sample size and classification difficulty on the accuracy of genomic predictors. Breast Cancer Res 2010;12(1):R5. PMID: 20064235
GSE17705	https://www.ncbi.nlm.nih.gov/geo/query/acc.cgi?acc=GSE17705	Symmans WF, Hatzis C, Sotiriou C, Andre F et al. Genomic index of sensitivity to endocrine therapy for breast cancer. J Clin Oncol 2010 Sep 20;28(27):4111-9. PMID: 20697068
GSE17907	https://www.ncbi.nlm.nih.gov/geo/query/acc.cgi?acc=GSE17907	Sircoulomb F, Bekhouche I, Finetti P, Adélaïde J et al. Genome profiling of ERBB2-amplified breast cancers. BMC Cancer 2010 Oct 8;10:539. PMID: 20932292
GSE19615	https://www.ncbi.nlm.nih.gov/geo/query/acc.cgi?acc=GSE19615	Li Y, Zou L, Li Q, Haibe-Kains B et al. Amplification of LAPTM4B and YWHAZ contributes to chemotherapy resistance and recurrence of breast cancer. Nat Med 2010 Feb;16(2):214-8. PMID: 20098429
GSE2034	https://www.ncbi.nlm.nih.gov/geo/query/acc.cgi?acc=GSE2034	Wang Y, Klijn JG, Zhang Y, Sieuwerts AM et al. Gene-expression profiles to predict distant metastasis of lymph-node-negative primary breast cancer. Lancet 2005 Feb 19-25;365(9460):671-9. PMID: 15721472
GSE20685	https://www.ncbi.nlm.nih.gov/geo/query/acc.cgi?acc=GSE20685	Kao KJ, Chang KM, Hsu HC, Huang AT. Correlation of microarray-based breast cancer molecular subtypes and clinical outcomes: implications for treatment optimization. BMC Cancer 2011 Apr 18;11:143. PMID: 21501481
GSE20711	https://www.ncbi.nlm.nih.gov/geo/query/acc.cgi?acc=GSE20711	Dedeurwaerder S, Desmedt C, Calonne E, Singhal SK et al. DNA methylation profiling reveals a predominant immune component in breast cancers. EMBO Mol Med 2011 Dec;3(12):726-41. PMID: 21910250
GSE21653	https://www.ncbi.nlm.nih.gov/geo/query/acc.cgi?acc=GSE21653	Sabatier R, Finetti P, Cervera N, Lambaudie E et al. A gene expression signature identifies two prognostic subgroups of basal breast cancer. Breast Cancer Res Treat 2011 Apr;126(2):407-20. PMID: 20490655
GSE25066	https://www.ncbi.nlm.nih.gov/geo/query/acc.cgi?acc=GSE25066	Hatzis C, Pusztai L, Valero V, Booser DJ et al. A genomic predictor of response and survival following taxane-anthracycline chemotherapy for invasive breast cancer. JAMA 2011 May 11;305(18):1873-81. PMID: 21558518
GSE2603	https://www.ncbi.nlm.nih.gov/geo/query/acc.cgi?acc=GSE2603	Minn AJ, Gupta GP, Siegel PM, Bos PD et al. Genes that mediate breast cancer metastasis to lung. Nature 2005 Jul 28;436(7050):518-24. PMID: 16049480
GSE2990	https://www.ncbi.nlm.nih.gov/geo/query/acc.cgi?acc=GSE2990	Sotiriou C, Wirapati P, Loi S, Harris A et al. Gene expression profiling in breast cancer: understanding the molecular basis of histologic grade to improve prognosis. J Natl Cancer Inst 2006 Feb 15;98(4):262-72. PMID: 16478745
GSE31519	https://www.ncbi.nlm.nih.gov/geo/query/acc.cgi?acc=GSE31519	Rody A, Karn T, Liedtke C, Pusztai L et al. A clinically relevant gene signature in triple negative and basal-like breast cancer. Breast Cancer Res 2011 Oct 6;13(5):R97. PMID: 21978456
GSE3494	https://www.ncbi.nlm.nih.gov/geo/query/acc.cgi?acc=GSE3494	Miller LD, Smeds J, George J, Vega VB et al. An expression signature for p53 status in human breast cancer predicts mutation status, transcriptional effects, and patient survival. Proc Natl Acad Sci U S A 2005 Sep 20;102(38):13550-5. PMID: 16141321
GSE37946	https://www.ncbi.nlm.nih.gov/geo/query/acc.cgi?acc=GSE37946	Liu JC, Voisin V, Bader GD, Deng T et al. Seventeen-gene signature from enriched Her2/Neu mammary tumor-initiating cells predicts clinical outcome for human HER2+:ERα- breast cancer. Proc Natl Acad Sci U S A 2012;10;109(15):5832-7. PMID: 22460789
GSE42568	https://www.ncbi.nlm.nih.gov/geo/query/acc.cgi?acc=GSE42568	Clarke C, Madden SF, Doolan P, Aherne ST et al. Correlating transcriptional networks to breast cancer survival: a large-scale coexpression analysis. Carcinogenesis 2013 Oct;34(10):2300-8. PMID: 23740839
GSE45255	https://www.ncbi.nlm.nih.gov/geo/query/acc.cgi?acc=GSE45255	Nagalla S, Chou JW, Willingham MC, Ruiz J et al. Interactions between immunity, proliferation and molecular subtype in breast cancer prognosis. Genome Biol 2013 Apr 29;14(4):R34. PMID: 23618380
GSE4611	https://www.ncbi.nlm.nih.gov/geo/query/acc.cgi?acc=GSE4611	Karn T, Metzler D, Ruckhäberle E, Hanker L et al. Data-driven derivation of cutoffs from a pool of 3,030 Affymetrix arrays to stratify distinct clinical types of breast cancer. Breast Cancer Res Treat 2010 Apr;120(3):567-79. PMID: 19455418
GSE46184	https://www.ncbi.nlm.nih.gov/geo/query/acc.cgi?acc=GSE46184	Milde-Langosch K, Karn T, Schmidt M, zu Eulenburg C et al. Prognostic relevance of glycosylation-associated genes in breast cancer. Breast Cancer Res Treat 2014 Jun;145(2):295-305. PMID: 24737166
GSE48390	https://www.ncbi.nlm.nih.gov/geo/query/acc.cgi?acc=GSE48390	Huang CC, Tu SH, Lien HH, Jeng JY et al. Concurrent gene signatures for han chinese breast cancers. PLoS One 2013;8(10):e76421. PMID: 24098497
GSE5327	https://www.ncbi.nlm.nih.gov/geo/query/acc.cgi?acc=GSE5327	Minn AJ, Gupta GP, Padua D, Bos P et al. Lung metastasis genes couple breast tumor size and metastatic spread. Proc Natl Acad Sci U S A 2007 Apr 17;104(16):6740-5. PMID: 17420468
GSE61304	https://www.ncbi.nlm.nih.gov/geo/query/acc.cgi?acc=GSE61304	Grinchuk OV, Motakis E, Yenamandra SP, Ow GS et al. Sense-antisense gene-pairs in breast cancer and associated pathological pathways. Oncotarget 2015 Dec 8;6(39):42197-221. PMID: 26517092
GSE65194	https://www.ncbi.nlm.nih.gov/geo/query/acc.cgi?acc=GSE65194	Maire V, Némati F, Richardson M, Vincent-Salomon A et al. Polo-like kinase 1: a potential therapeutic option in combination with conventional chemotherapy for the management of patients with triple-negative breast cancer. Cancer Res 2013 Jan 15;73(2):813-23. PMID: 23144294
GSE69031	https://www.ncbi.nlm.nih.gov/geo/query/acc.cgi?acc=GSE69031	Chin K, DeVries S, Fridlyand J, Spellman PT et al. Genomic and transcriptional aberrations linked to breast cancer pathophysiologies. Cancer Cell 2006 Dec;10(6):529-41. PMID: 17157792
GSE7390	https://www.ncbi.nlm.nih.gov/geo/query/acc.cgi?acc=GSE7390	Desmedt C, Piette F, Loi S, Wang Y et al. Strong time dependence of the 76-gene prognostic signature for node-negative breast cancer patients in the TRANSBIG multicenter independent validation series. Clin Cancer Res 2007 Jun 1;13(11):3207-14. PMID: 17545524
GSE9195	https://www.ncbi.nlm.nih.gov/geo/query/acc.cgi?acc=GSE9195	Loi S, Haibe-Kains B, Desmedt C, Wirapati P et al. Predicting prognosis using molecular profiling in estrogen receptor-positive breast cancer treated with tamoxifen. BMC Genomics 2008 May 22;9:239. PMID: 18498629
